# Supplementary material
Source: PubMed Central journal article supplement (PMC4668127)
Supplement: NIHMS700029-supplement-Methods_and_Materials.pdf [file NIHMS700029-supplement-Methods_and_Materials.pdf]

## **SUPPLEMENTAL MATERIAL**

### **The presence of XX versus XY sex chromosomes is associated with increased HDL cholesterol levels in the mouse**

Jenny C. Link, Xuqi Chen, Christopher Prien, Mark S. Borja, Bradley Hammerson, Michael N. Oda, Arthur P. Arnold, and Karen Reue

#### **MATERIALS AND METHODS**

##### **Mice**

Four Core Genotypes (FCG) C57BL/6 mice were bred and genotyped as described previously.<sup>1</sup> Briefly, XX female mice were mated with XY–(Sry+) male mice to generate XX, XX(Sry+), XY–, and XY–(Sry+) offspring, and genotyping was performed by PCR to detect presence of the Sry transgene (forward: AGCCCTACAGCCACATGATA; reverse: GTCTTGCCTGTATGTGATGG) and Y-chromosome–specific sequence (forward: CTGGAGCTCTACAGTGATGA; reverse: CAGTTACCAATCAACACATCAC).<sup>1</sup> Where indicated, gonadectomy was performed at 75 days of age, as previously described.<sup>1</sup> XY\* mice, backcrossed to strain C57BL/6EiJ for >10 generations, were bred as described previously.<sup>1,2</sup> XY\* males have the Y\* chromosome that recombines aberrantly with the X chromosome. Mating XY\* males with XX females generates the three genotypes included in this study: XX, XX<sub>Y\*</sub>, and XY\*, which are similar to XX, XXY, and XY mice, respectively. Progeny of XY\* mice were gonadectomized at 75 days of age, as previously described.<sup>1</sup>

Gonadal males and females were housed in separate cages and maintained at 23°C with a 12:12 hour light:dark cycle. All mice were initially fed Purina mouse chow diet containing 5% fat (Purina 5001; PMI Nutrition International, St. Louis, MO). Where specified, mice were fed a chow diet until age 3.5 months of age (4 weeks after gonadectomy), and then fed an atherogenic diet for 16 weeks (diet TG90221 containing 7.5% cocoa butter, 1.25% cholesterol, 0.5% sodium cholate; Teklad Research Diets, Madison, WI).

For all studies, blood samples were obtained at 7.5 months of age (FCG mice) or 14 months of age (XY\* mice) after fasting 0800–1300. Plasma was collected after centrifugation of whole blood at 3,400 x g for 10 minutes at 4°C. Mouse studies were conducted in accordance with and approved by the Institutional Animal Research Committee of the University of California, Los Angeles.

##### **Measurement of plasma lipid**

Total cholesterol, HDL cholesterol, free cholesterol, triglycerides, and free fatty acid levels were determined by enzymatic colorimetric assays.<sup>3</sup> Combined LDL cholesterol and VLDL cholesterol concentration was determined by subtracting HDL cholesterol values from total cholesterol values. Lipoproteins were fractionated from 150 µL of plasma pooled from 3 mice of each genotype by fast protein liquid chromatography at the Mouse Metabolic Phenotyping Center (Vanderbilt University, Nashville, TN).

##### **HDL-ApoA-I Exchange Assay**

The HDL-ApoA-I exchange assay was performed on freshly thawed plasma using site-directed spin-label electron paramagnetic resonance (EPR) as described by Borja

et al.<sup>4</sup> Briefly, plasma samples (in triplicate) were diluted by a factor of 4 in PBS and PEG 6000 was added to a final concentration of 4%. ApoB-containing lipoproteins were removed by centrifugation (13,000 rpm, 10 min, 4°C), and clarified plasma was combined with spin-labeled apoA-I. EPR measurements were performed on each sample at 6°C and again after 15 min at 37°C using a Bruker eScan EPR spectrometer with temperature controller (Noxygen). HDL-apoA-I exchange activity was defined as the value obtained at 6°C (normalized to an internal standard) from value obtained at 37°C (normalized to same internal standard) followed by subtracting the baseline spectra for spin-labeled apoA-I in PBS. Additional calculations were performed as described.<sup>4</sup>

### **Immunoblotting**

Plasma aliquots (0.5 uL) were fractionated by SDS-PAGE in a 4-20% Tris-glycine gel and transferred onto a nitrocellulose membrane. Rabbit anti-mouse antibodies against ApoA-I, ApoA-II, and ApoA-IV were described previously<sup>5,6</sup> and used at 1:4000 dilution. Rabbit anti-mouse antibody against ApoE (Cat. K23100R, Meridian Life Science, Memphis, TN) was used at 1:2000. A mouse monoclonal antibody against ApoB<sup>7</sup> was used at 1:1000. HRP-conjugated rabbit anti-mouse antibody against IgG or HRP-conjugated goat anti-rabbit antibody against IgG was used at 1:10,000 (Cat. Sc-2030, Santa Cruz Biotechnology, Santa Cruz, CA). Chemiluminescence (ECL2, Cat. 80196, Thermo Fisher, Rockford, IL) was detected using ChemiDoc XRS+ and quantified by ImageLab 4.0.1 (Bio-Rad, Hercules, CA).

### **Quantitative RT-PCR**

Mouse livers were dissected, flash frozen in liquid nitrogen, and stored at –80°C. RNA was isolated from tissues using Ribozol (Cat. N580, Amresco, Solon, OH). First strand cDNA was generated by reverse transcription with iScript (Cat. 170-8840, Bio-Rad). Quantitative RT-PCR was performed with a Bio-Rad CFX Connect Real-Time PCR Detection System using SsoAdvanced SYBR Green Supermix (Bio-Rad).  $\beta$ 2 microglobulin and TATA box-binding protein mRNA were amplified in each sample as normalization controls. All primer sequences are shown in Supplemental Table II.

### **Statistical Analysis**

Groups were compared using two-way ANOVA (NCSS 2001; Number Cruncher Statistical Systems, Kaysville, UT) with main factors of sex (gonadal male vs. gonadal female) and sex chromosome complement (XX vs. XY). In the XY\* study, the three groups were compared using one-way ANOVA with Duncan's multiple comparison test. Statistically significant comparisons or interactions are presented ( $p < 0.05$ ). All error bars represent one standard deviation.

## Methods References

1. Chen X, McClusky R, Chen J, Beaven SW, Tontonoz P, Arnold AP, Reue K. The number of x chromosomes causes sex differences in adiposity in mice. *PLoS Genet.* 2012;8:e1002709.
2. Eicher E, Hale D, Hunt P, Lee B, Tucker P, King T, Eppig J, Washburn L. The mouse Y\* chromosome involves a complex rearrangement, including interstitial positioning of the pseudoautosomal region. *Cytogenet Cell Genet.* 1991;57:221-230.
3. Mehrabian M, Qiao J, Hyman R, Ruddle D, Laughton C, Lusis AJ. Influence of the ApoA-II Gene Locus on HDL Levels and Fatty Streak Development in Mice. *Arterioscler Thromb Vasc Biol.* 1993;13:1-10.
4. Borja MS, Zhao L, Hammerson B, Tang C, Yang R, Carson N, Fernando G, Liu X, Budamagunta MS, Genest J, Shearer GC, Duclos F, Oda MN. HDL-apoA-I exchange: rapid detection and association with atherosclerosis. *PLoS One.* 2013;8:e71541.
5. Reue K, Leete TH. Genetic variation in mouse apolipoprotein A-IV due to insertion and deletion in a region of tandem repeats. *J Biol Chem.* 1991;266:12715-12721.
6. LeBoeuf RC, Doolittle MH, Montcalm A, Martin DC, Reue K, Lusis AJ. Phenotypic characterization of the Ath-1 gene controlling high density lipoprotein levels and susceptibility to atherosclerosis. *J Lipid Res.* 1990;31:91-101.
7. Nguyen AT, Braschi S, Geoffrion M, Fong LG, Crooke RM, Graham MJ, Young SG, Milne R. A mouse monoclonal antibody specific for mouse apoB48 and apoB100 produced by immunizing "apoB39-only" mice with mouse apoB48. *Biochim Biophys Acta.* 2006;1761:182-185.
