# Supplementary material
Source: PubMed Central journal article supplement (PMC4668127)
Supplement: NIHMS700029-supplement-Supplemental_Figures.pdf [file NIHMS700029-supplement-Supplemental_Figures.pdf]

Supplemental Table I. Apolipoprotein quantification

|             |     | <b>ApoAI</b> | <b>ApoAII</b> | <b>ApoAIV</b> | <b>ApoB</b> | <b>ApoE</b> |
|-------------|-----|--------------|---------------|---------------|-------------|-------------|
| Chow Intact | XXF | 1.10 (0.32)  | 0.61 (0.39)   | 0.63 (0.19)   |             | 0.62 (0.14) |
|             | XXM | 1.70 (0.19)  | 1.98 (0.58)   | 0.59 (0.07)   | not         | 1.39 (0.19) |
|             | XYF | 1.72 (0.37)  | 1.85 (1.23)   | 1.09 (0.41)   | detected    | 1.01 (0.24) |
|             | XYM | 2.11 (0.12)  | 3.14 (1.60)   | 1.07 (0.14)   |             | 1.79 (0.34) |
| Chow GDX    | XXF | 1.77 (0.28)  | 1.80 (0.42)   | 1.03 (0.37)   |             | 1.07 (0.12) |
|             | XXM | 2.30 (0.07)  | 3.24 (0.64)   | 1.06 (0.06)   | not         | 1.09 (0.28) |
|             | XYF | 3.10 (0.40)  | 3.18 (0.76)   | 1.53 (0.14)   | detected    | 1.61 (0.27) |
|             | XYM | 2.12 (0.19)  | 1.78 (0.80)   | 1.19 (0.27)   |             | 0.99 (0.25) |
| HCD Intact  | XXF | 1.27 (0.13)  | 7.14 (1.76)   | 3.20 (0.35)   | 4.79 (0.44) | 3.41 (0.33) |
|             | XXM | 1.12 (0.08)  | 5.78 (0.39)   | 2.76 (0.16)   | 5.29 (0.88) | 2.08 (0.16) |
|             | XYF | 0.91 (0.07)  | 3.39 (0.84)   | 2.83 (0.10)   | 4.66 (0.83) | 3.16 (0.37) |
|             | XYM | 1.15 (0.17)  | 3.28 (1.29)   | 2.15 (0.49)   | 5.08 (0.06) | 2.66 (0.66) |
| HCD GDX     | XXF | 3.18 (0.46)  | 2.62 (0.21)   | 0.75 (0.02)   | 6.52 (2.76) | 0.69 (0.03) |
|             | XXM | 3.59 (0.55)  | 3.07 (0.66)   | 0.65 (0.05)   | 2.16 (0.52) | 1.12 (0.19) |
|             | XYF | 3.64 (0.20)  | 1.63 (0.54)   | 0.78 (0.03)   | 3.31 (0.68) | 0.76 (0.14) |
|             | XYM | 3.46 (0.63)  | 0.97 (1.08)   | 0.68 (0.07)   | 7.47 (0.49) | 1.78 (0.63) |

**Supplemental Table I.** Quantification of apolipoproteins. Three representative plasma samples from each genotype and from each cohort were separated by gel electrophoresis. Protein levels of apolipoproteins were quantified by densitometry and given as mean values with standard deviation in parentheses. F, gonadal female; M, gonadal male; HCD, high cholesterol diet.

Supplemental Table II. Mouse primer sequences for qPCR

| Genes          | Forward primer          | Reverse primer          |
|----------------|-------------------------|-------------------------|
| <i>β2m</i>     | CAGCATGGCTCGCTCGGTGAC   | CGTAGCAGTTCAGTATGTTCCG  |
| <i>Tbp</i>     | ACCCTTCACCAATGACTCCTATG | ATGATGACTGCAGCAAATCGC   |
| <i>Abca1</i>   | ACCAGCTTCCATCCTCCTTGT   | TTGGTCCTTGGCAAAGTTCAC   |
| <i>Abcg1</i>   | CCTGCTCTTCTCCGGATTCTT   | ATGTCGCAGTGCAGGTCTTCT   |
| <i>ApoB</i>    | CAGTATTCTGCCACTGCAACC   | AGGACTTCACTAGATAAGGTCC  |
| <i>Hmgcr</i>   | ATGCCTTGTGATTGGAGTTGG   | TGGACGACCCTCACGGCTTTC   |
| <i>Lcat</i>    | CCCACCAGCAGGATGAATACTAC | AGGCTATGCCCAATGAGGAA    |
| <i>Ldlr</i>    | CTTCTCCTTGGCCATCTATGAGG | CATTGGGGAGGAGGGCTGTTGT  |
| <i>Lipc</i>    | TGGAACACAGTGCAGACCATC   | TGGAGGTCATCCAGATTTTCG   |
| <i>Mvk</i>     | TGACCAAGTTCCTGAGATTG    | CTTGCTCTAGACCTGGCTTC    |
| <i>Pltp</i>    | GGCCGTCTCAGTGCTAAGTTG   | ATCACTCCGATTTGCAGCAGT   |
| <i>Scarb1</i>  | CGTACCTCCCAGACATGCTTC   | TCTTGCTGAGTCCGTTCCATT   |
| <i>Cyp7a1</i>  | CAATGAAAGCAGCCTCTGAAG   | AGCCTCCTTGATGATGCTATC   |
| <i>Cyp8b1</i>  | AAGGCTGGCTTCCTGAGCTT    | AACAGCTCATCGGCCTCATC    |
| <i>Cyp27a1</i> | CCACAAGGGCCTCACCTATG    | GCACCTGGTCCAGCCGGGTG    |
| <i>Ddx3x</i>   | GGATCACGGGGTGATTCAAGAGG | CTATCTCCACGGCCACCAATGC  |
| <i>Eif2s3x</i> | TTGTGCCGAGCTGACAGAATGG  | CGACAGGGAGCCTATGTTGACCA |
| <i>Kdm5c</i>   | ACCCACCTGGCAAAAACATTGG  | ACTGTCTGAAGGGGGATGCTGTG |
| <i>Kdm6a</i>   | CCAATCCCCGCAGAGCTTACCT  | TTGCTCGGAGCTGTTCCAAGTG  |

Supplemental Figure I

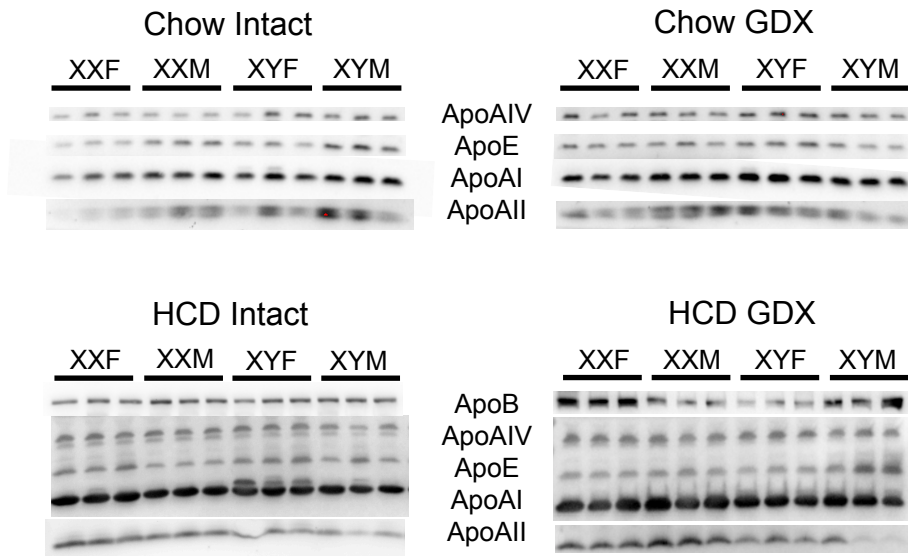

**Supplemental Figure I.** Plasma levels of apolipoproteins. Three representative plasma samples from each genotype and from each cohort were separated by gel electrophoresis. F, gonadal female; M, gonadal male; HCD, high cholesterol diet.

Supplemental Figure II

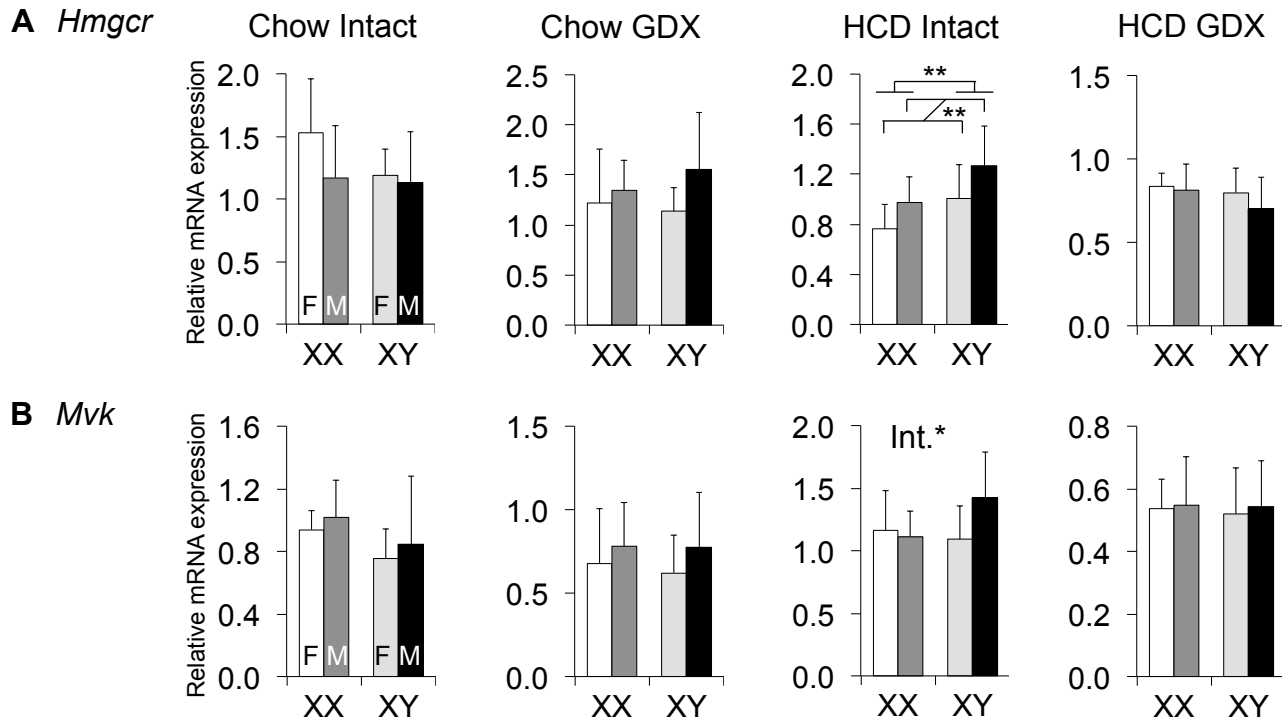

**Supplemental Figure II.** Key enzymes of cholesterol synthesis are not associated with sex differences in plasma cholesterol levels. Hepatic levels of *Hmgcr* (**A**) and *Mvk* (**B**) were measured by quantitative PCR. All values represent the mean  $\pm$  standard deviation. Significant comparisons for sex chromosome complement and for gonadal sex are denoted by brackets. A significant interaction of sex chromosome complement and gonadal sex is denoted by "Int." \*,  $P \leq 0.05$ ; \*\*,  $P \leq 0.01$ . F, gonadal female; M, gonadal male; HCD, high cholesterol diet.

Supplemental Figure III

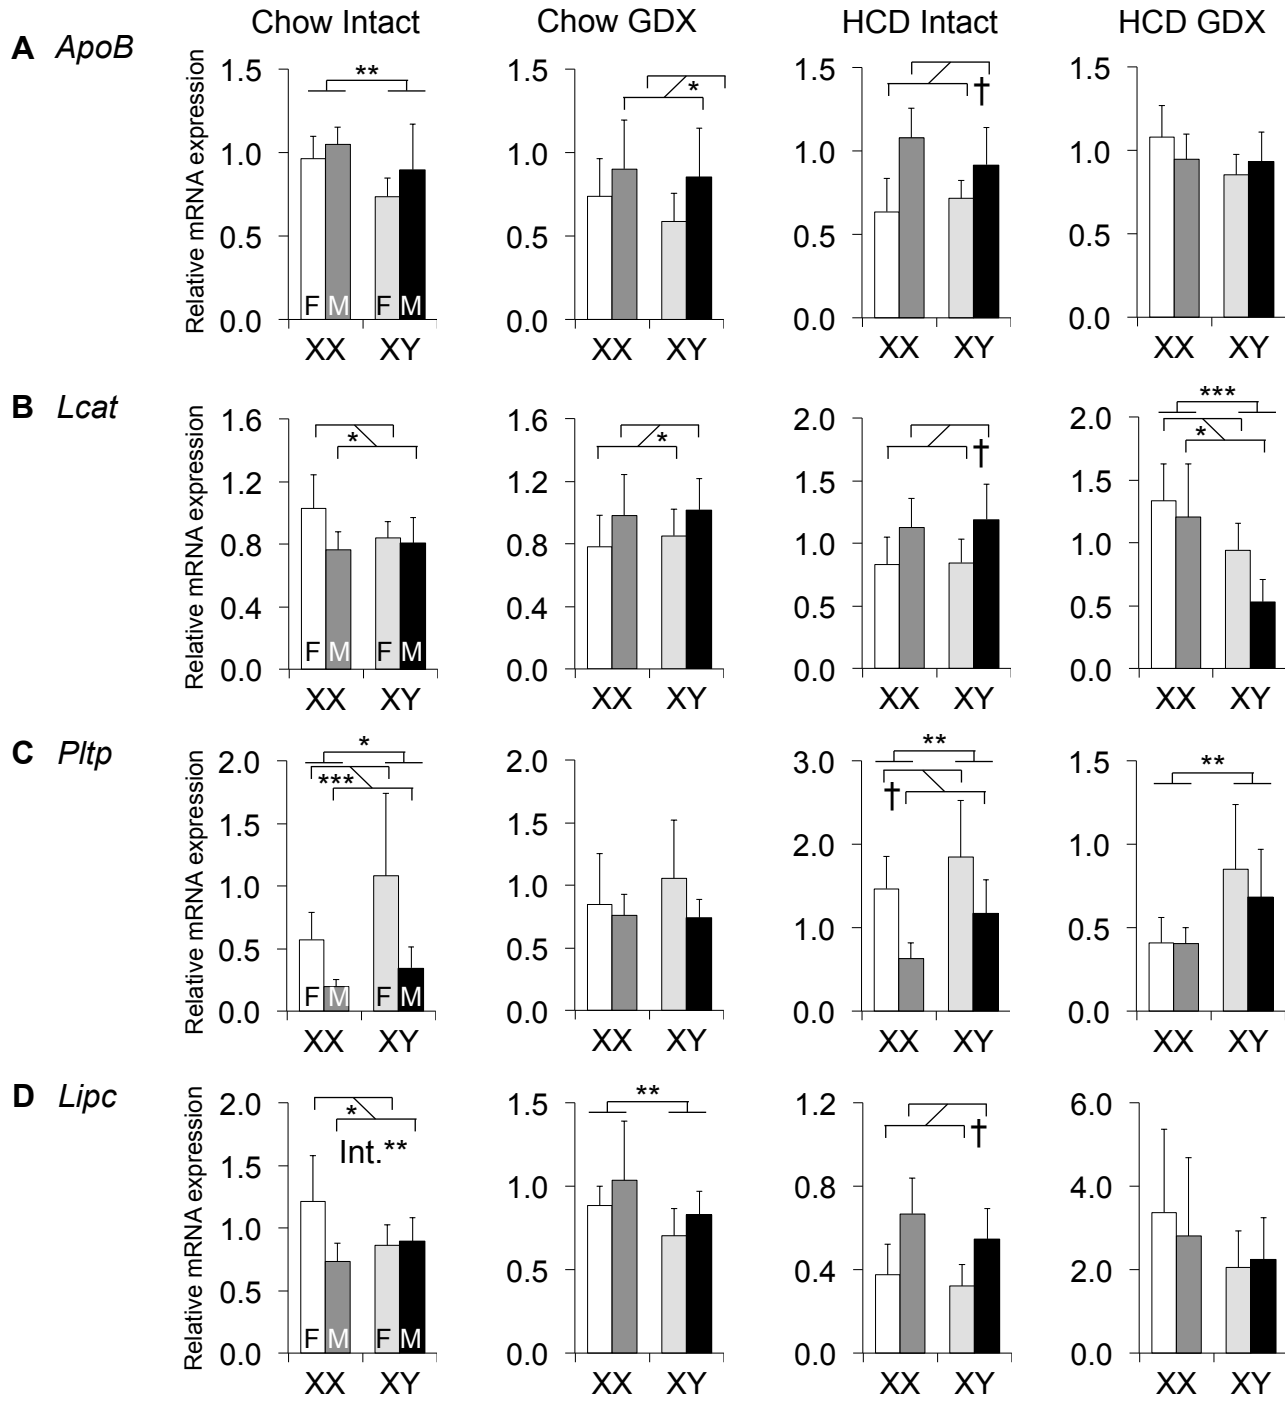

Supplemental Figure III, continued

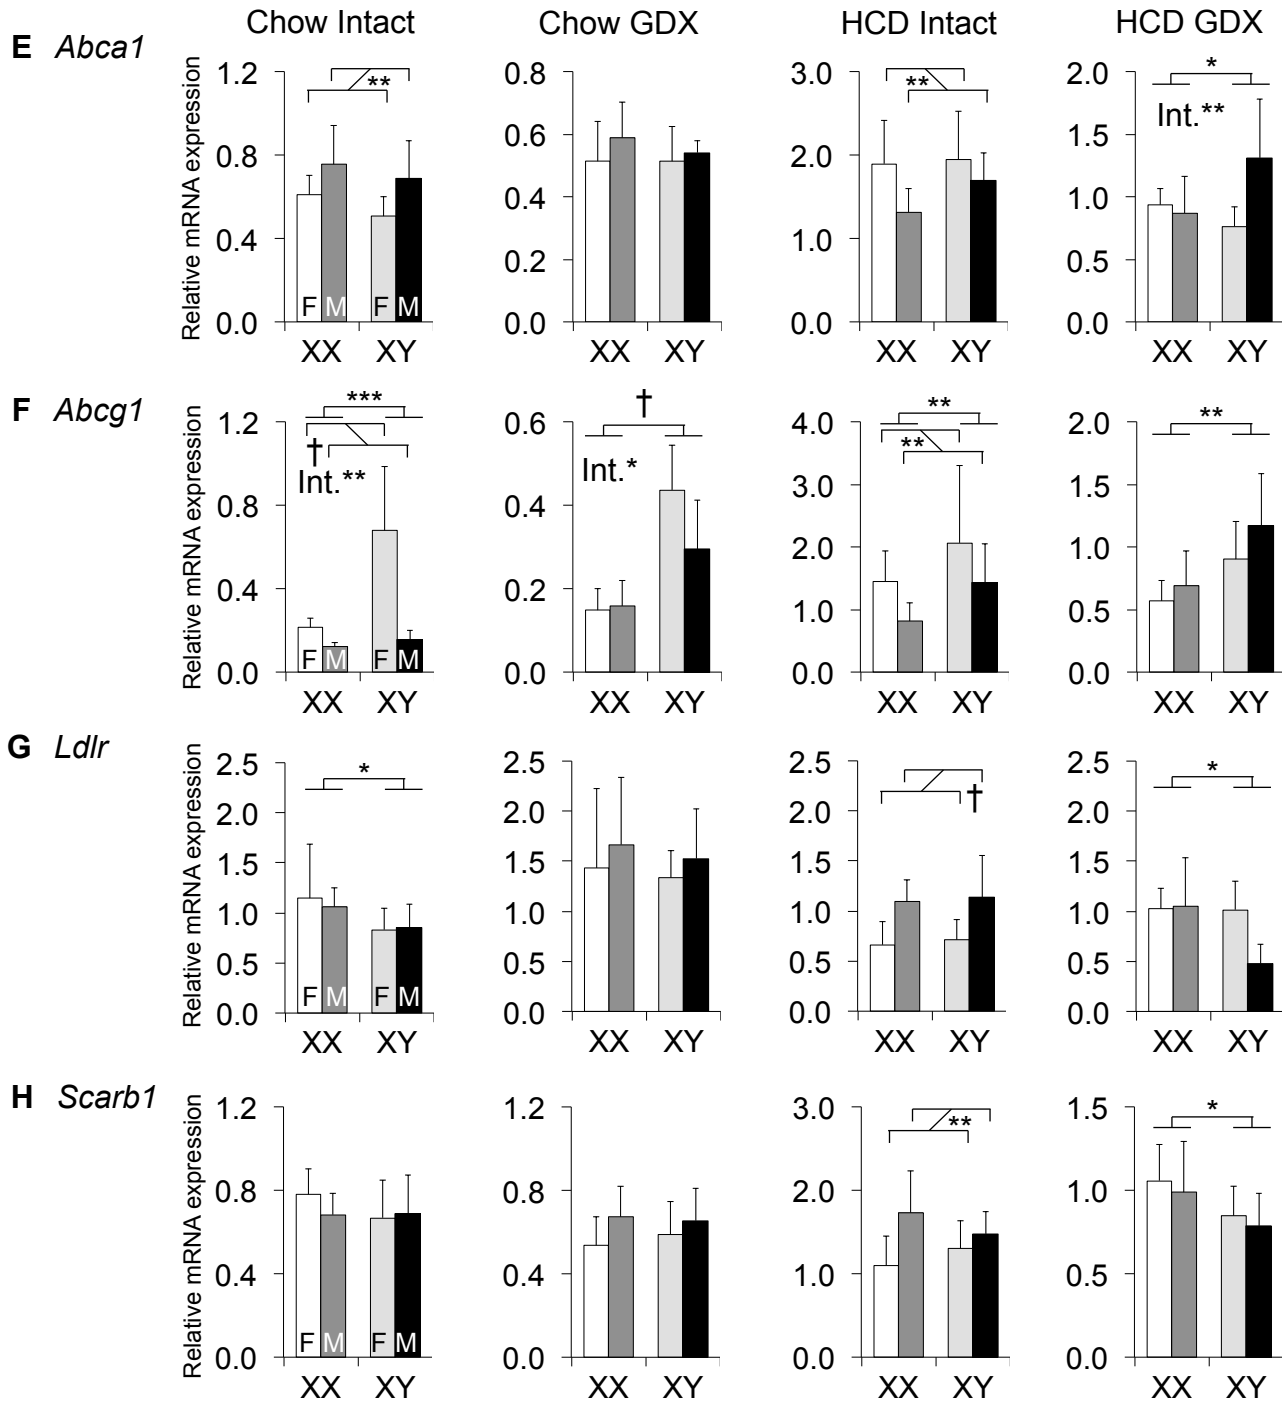

**Supplemental Figure III.** Components of lipoprotein synthesis, remodeling, and uptake are not associated with plasma HDL cholesterol levels. Relative mRNA expression was measured by quantitative PCR. All values represent the mean  $\pm$  standard deviation. Significant comparisons for sex chromosome complement and for gonadal sex are denoted by brackets. A significant interaction of sex chromosome complement and gonadal sex is denoted by "Int." \*,  $P \leq 0.05$ ; \*\*,  $P \leq 0.01$ ; \*\*\*,  $P \leq 0.001$ ; †,  $P \leq 0.0001$ . F, gonadal female; M, gonadal male; HCD, high cholesterol diet.

Supplemental Figure IV

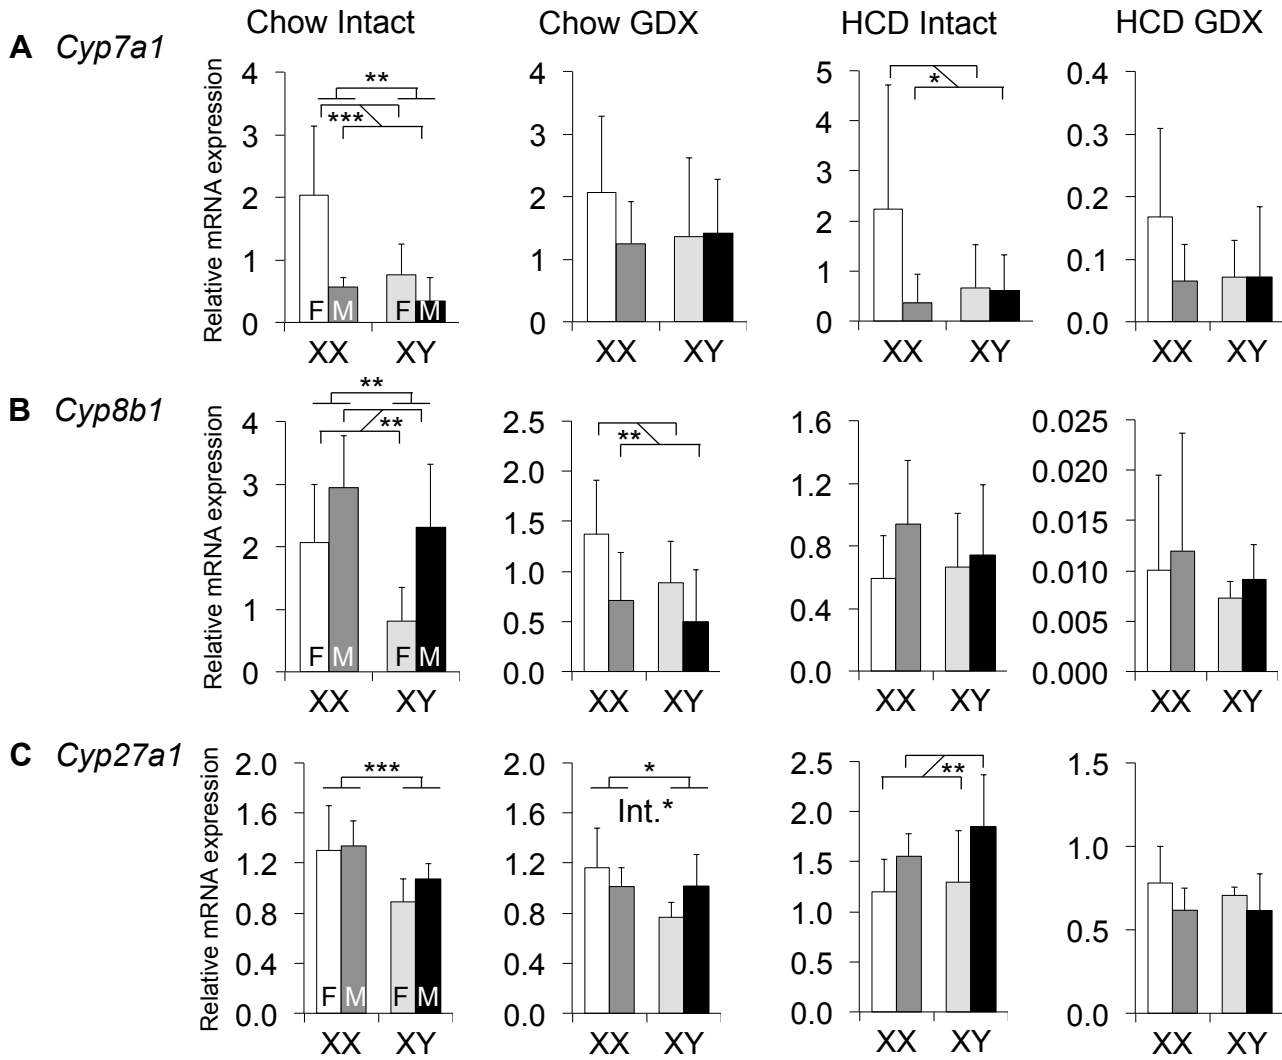

**Supplemental Figure IV.** Key enzymes of bile acid synthesis do not explain sex differences in plasma cholesterol levels. All values represent the mean  $\pm$  standard deviation. Significant comparisons for sex chromosome complement and for gonadal sex are denoted by brackets. A significant interaction of sex chromosome complement and gonadal sex is denoted by "Int." \*,  $P \leq 0.05$ ; \*\*,  $P \leq 0.01$ ; \*\*\*,  $P \leq 0.001$ . F, gonadal female; M, gonadal male; HCD, high cholesterol diet.

Supplemental Figure V

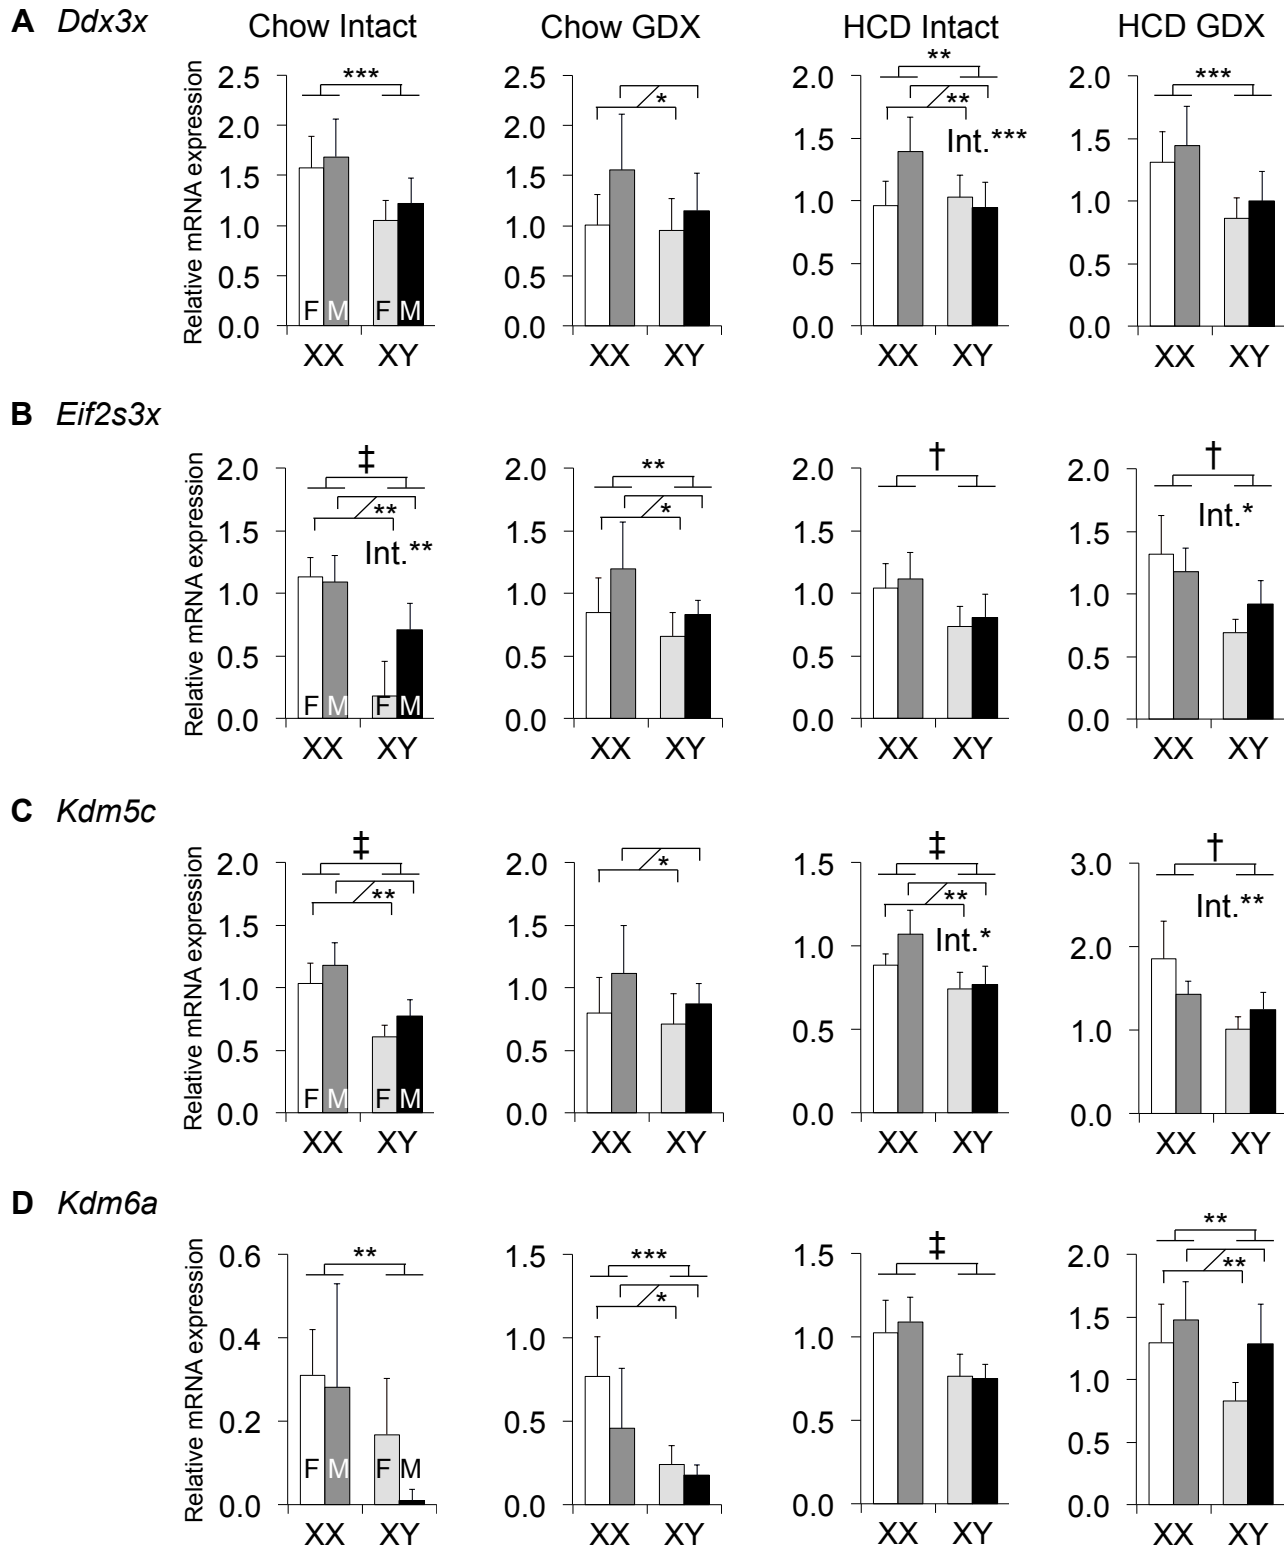

**Supplemental Figure V.** Genes escaping X-inactivation are consistent with XX–XY differences in HDL cholesterol levels. All values represent the mean  $\pm$  standard deviation. Significant comparisons for sex chromosome complement and for gonadal sex are denoted by brackets. A significant interaction of sex chromosome complement and gonadal sex is denoted by “Int.” \*,  $P \leq 0.05$ ; \*\*,  $P \leq 0.01$ ; \*\*\*,  $P \leq 0.001$ ; †,  $P \leq 0.0001$ ; ‡,  $P \leq 0.000001$ . F, gonadal female; M, gonadal male; HCD, high cholesterol diet.
